# Supplementary material for: Dimers formed with the mixed-type G-quadruplex binder pyridostatin specifically recognize human telomere G-quadruplex dimers
Source: Royal Society of Chemistry journal article supplement (doi:10.1039/c9ob02470k), 2019-12-27
Supplement: c9ob02470k1.pdf [file c9ob02470k1.pdf]

## **Dimers formed by mixed-type G-quadruplex binder pyridostatin specifically recognize human telomere G-quadruplex dimers**

Tian-Zhu Ma,<sup>a</sup> Meng-Jia Zhang,<sup>a</sup> Ting-Cong Liao,<sup>a</sup> Jun-Hui Li,<sup>a</sup> Min Zou,<sup>a</sup> Zhou-Mo Wang<sup>b</sup> and Chun-

Qiong Zhou<sup>a\*</sup>

<sup>a</sup> Guangdong Provincial Key Laboratory of New Drug Screening, School of Pharmaceutical Sciences, Southern Medical University, Guangzhou 510515, P. R. China

<sup>b</sup> Medical School, Science and Technology College of Hubei University for Nationalities, Enshi 445000, P. R. China

\* Email: zcqlg@smu.edu.cn.

### **Electronic Supplementary Information**

|                                                            |    |
|------------------------------------------------------------|----|
| <sup>1</sup> H NMR, <sup>13</sup> C NMR and HR-ESI-MS..... | 2  |
| SPR.....                                                   | 13 |
| CD spectra.....                                            | 15 |
| CD-melting.....                                            | 16 |
| ITC.....                                                   | 19 |
| Fluorescence spectra.....                                  | 19 |
| Telomerase inhibition.....                                 | 20 |

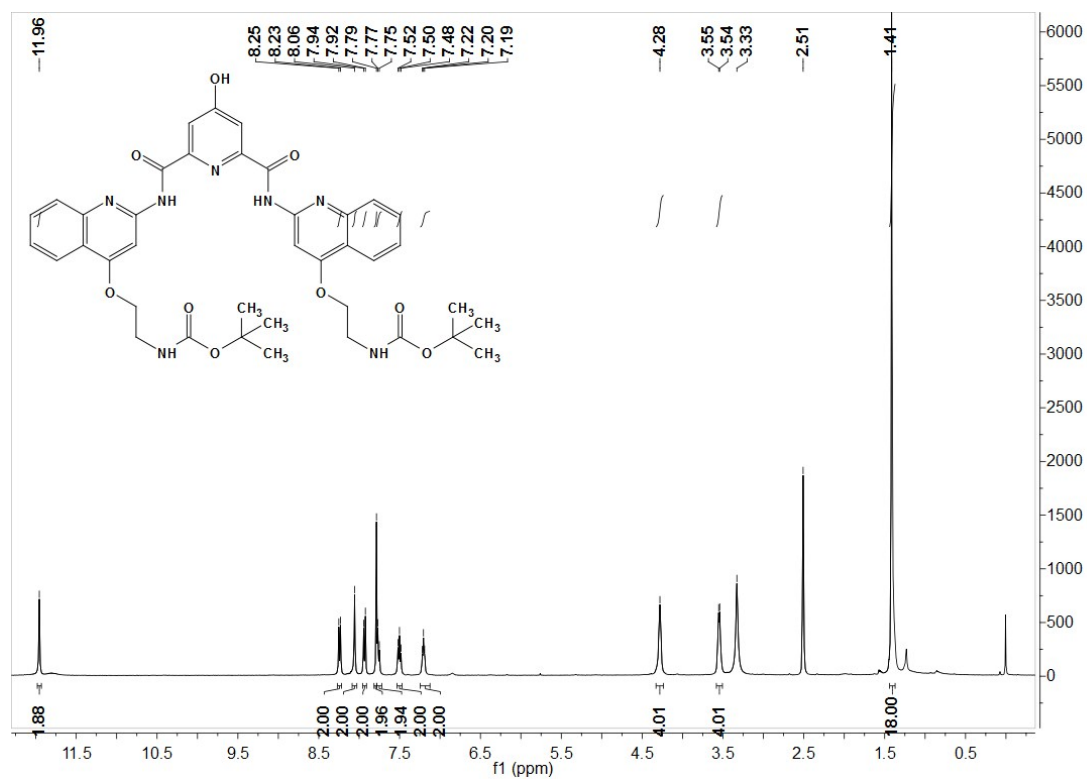

**Figure S1**  $^1\text{H}$  NMR (400 MHz) of compound **4** in  $\text{DMSO}-d_6$ .

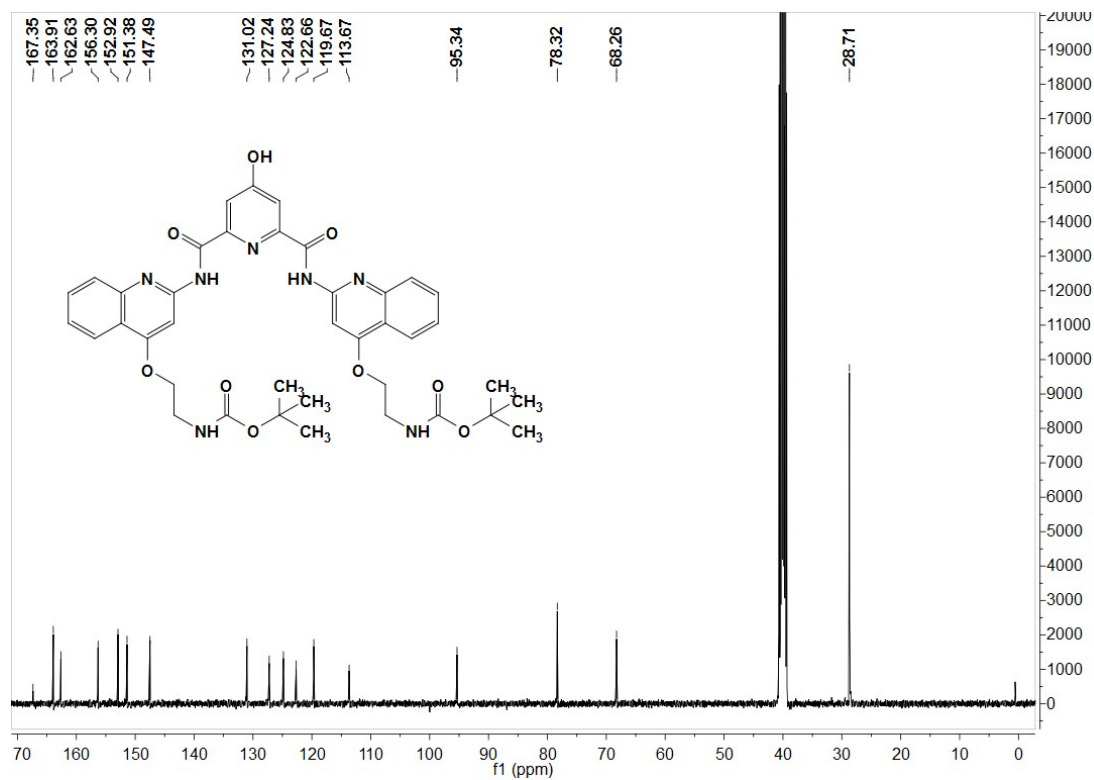

**Figure S2**  $^{13}\text{C}$  NMR (100 MHz) of compound **4** in  $\text{DMSO}-d_6$ .

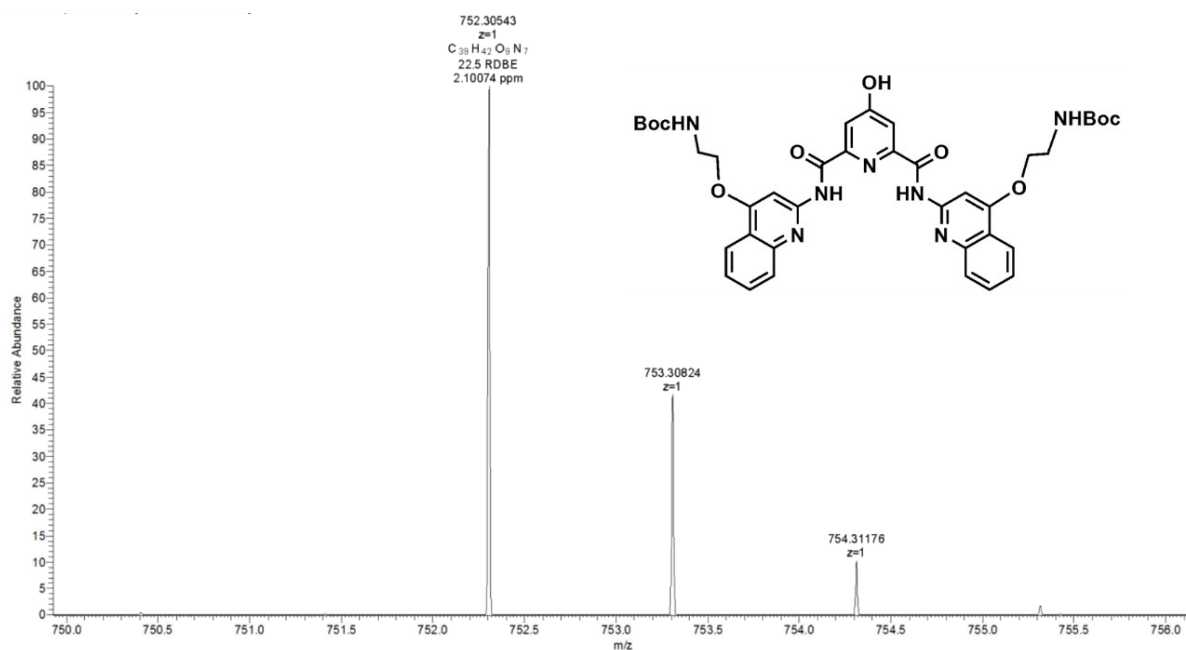

**Figure S3** HR-ESI-MS of compound **4**.

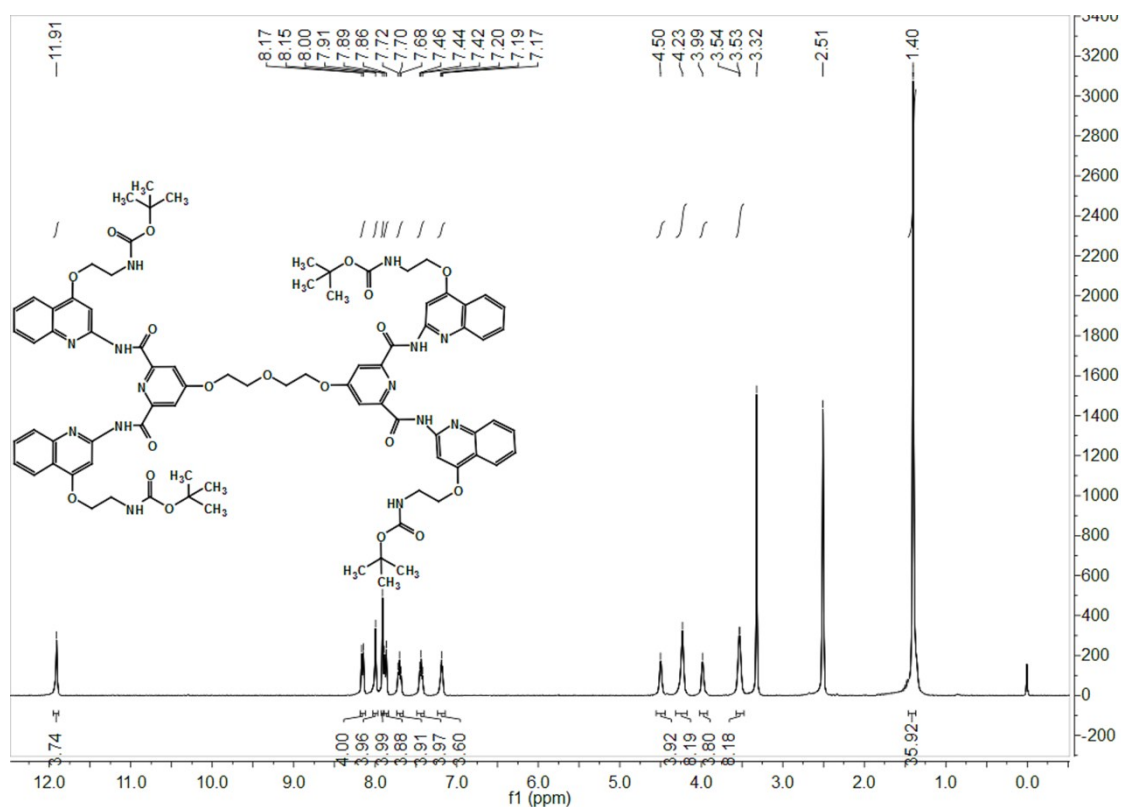

**Figure S4** <sup>1</sup>H NMR (400 MHz) of compound **6a** in DMSO-*d*<sub>6</sub>.

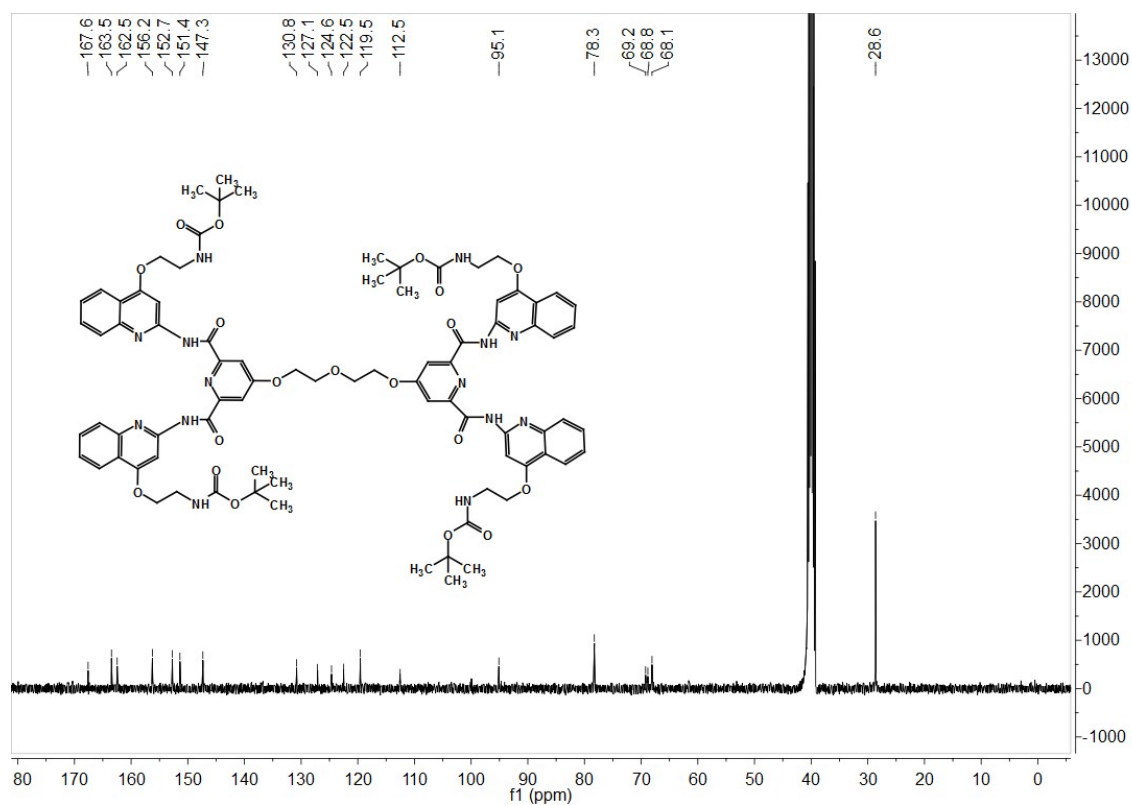

Figure S5 <sup>13</sup>C NMR (100 MHz) of compound 6a in DMSO-*d*<sub>6</sub>.

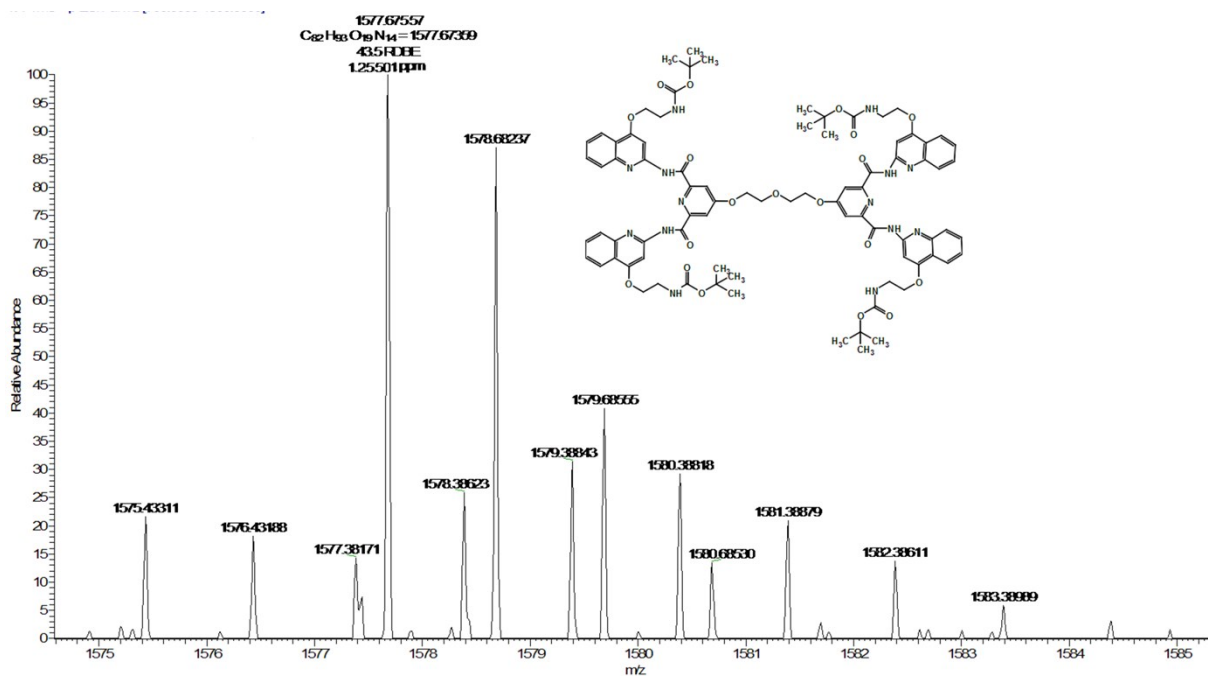

Figure S6 HR-ESI-MS of compound 6a.

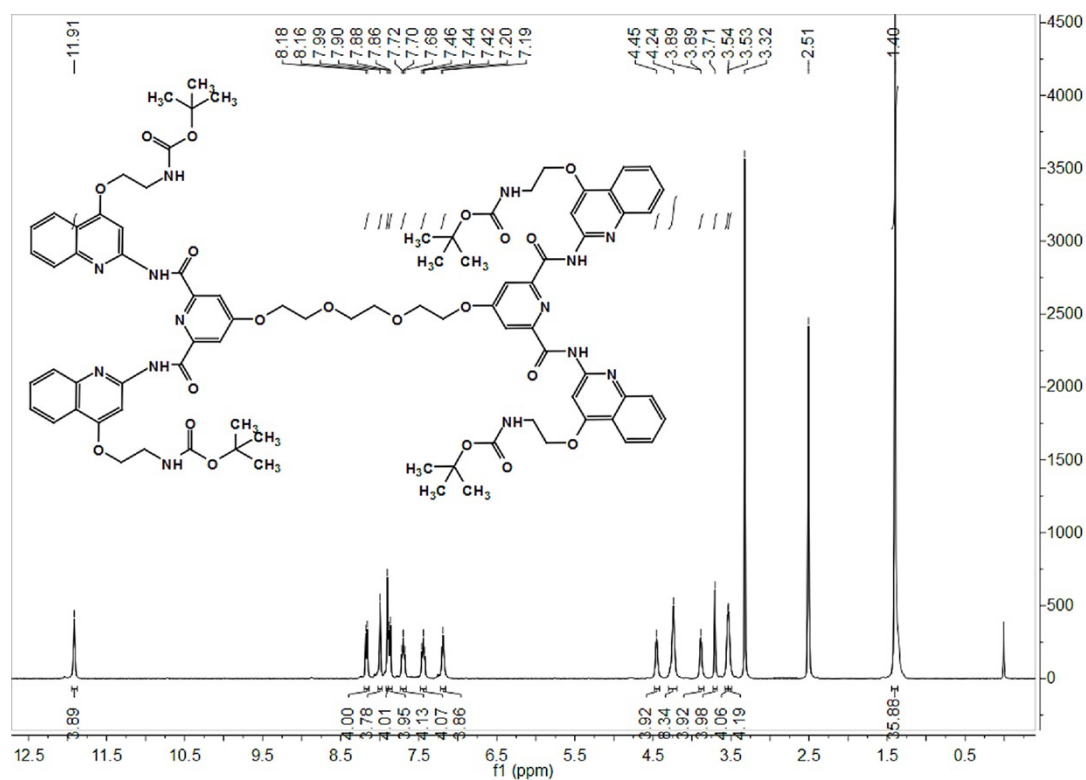

**Figure S7**  $^1\text{H}$  NMR (400 MHz) of compound **6b** in  $\text{DMSO-}d_6$ .

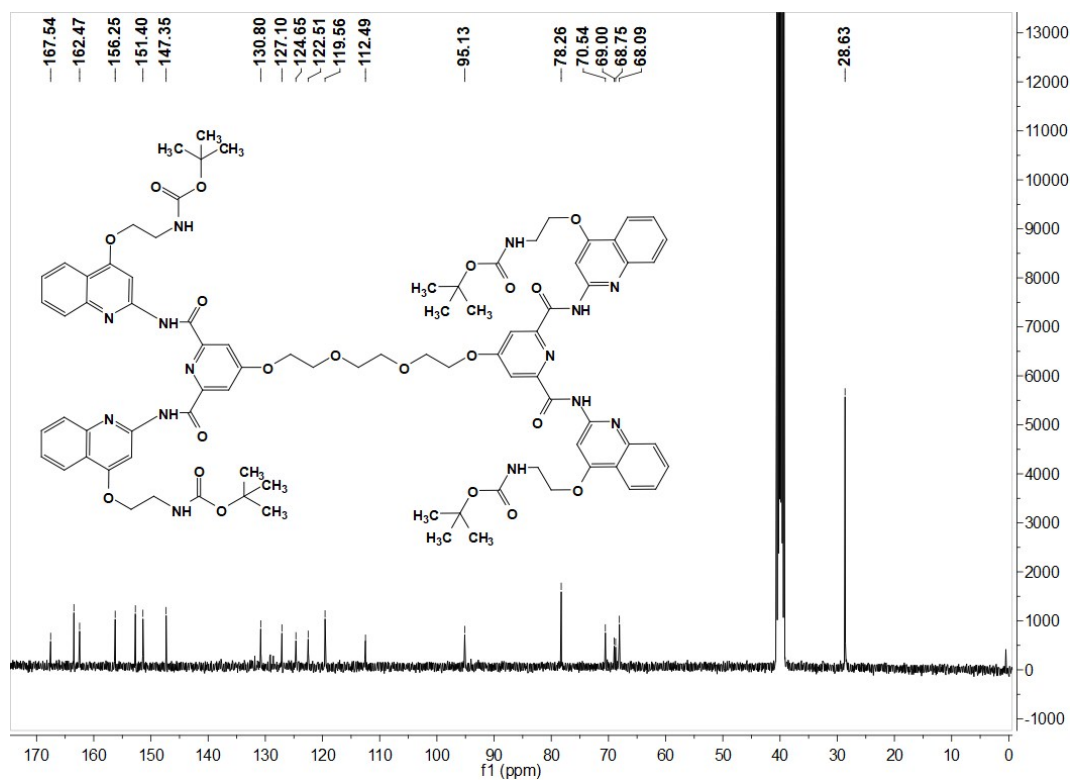

**Figure S8**  $^{13}\text{C}$  NMR (100 MHz) of compound **6b** in  $\text{DMSO-}d_6$ .

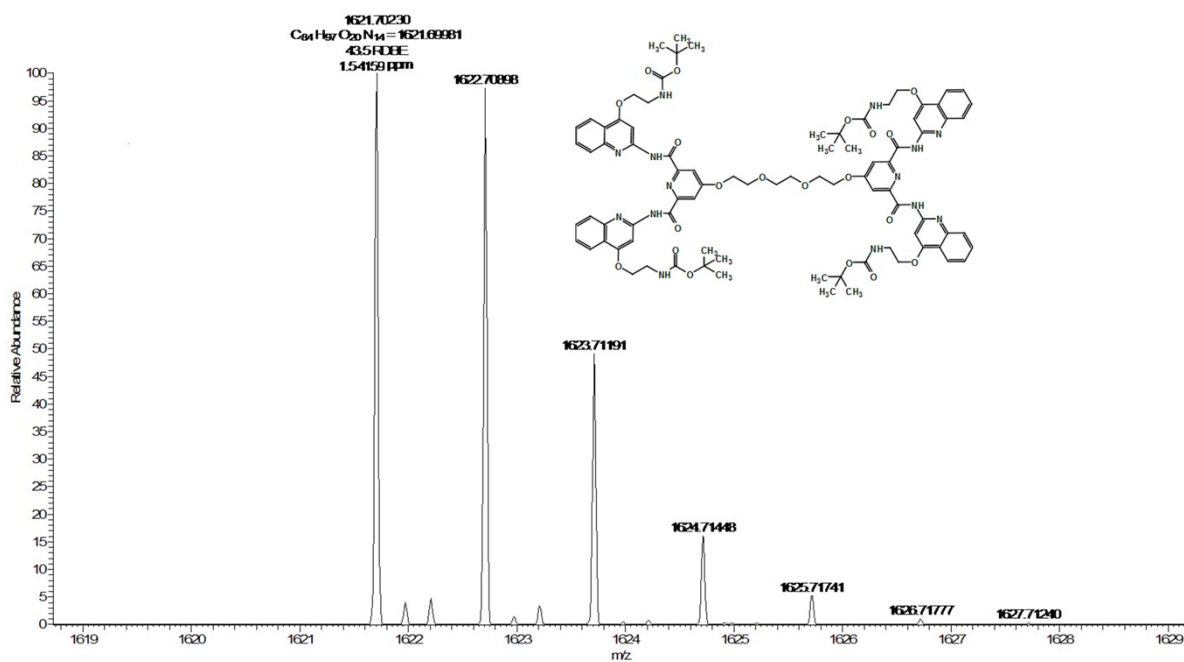

Figure S9 HR-ESI-MS of compound **6b**.

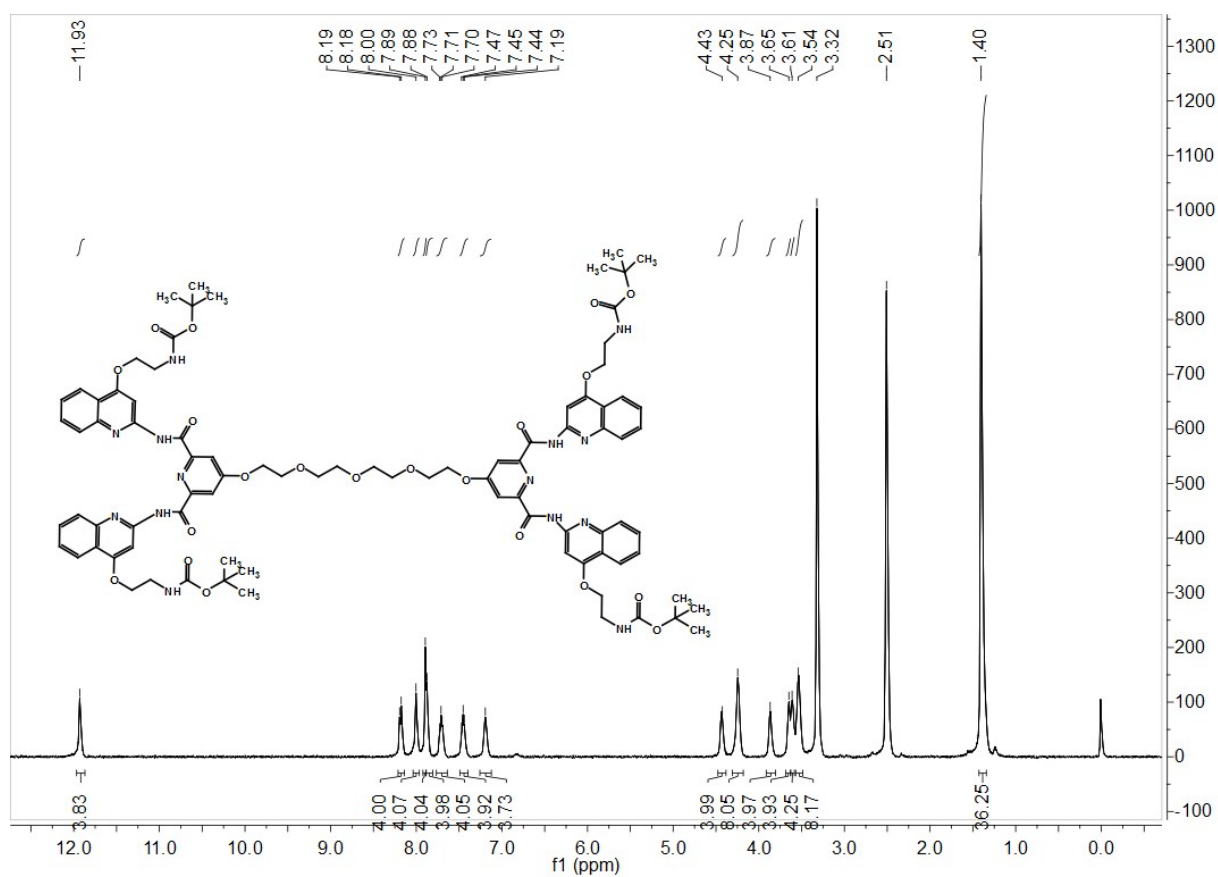

Figure S10  $^1\text{H}$  NMR (400 MHz) of compound **6c** in  $\text{DMSO}-d_6$ .

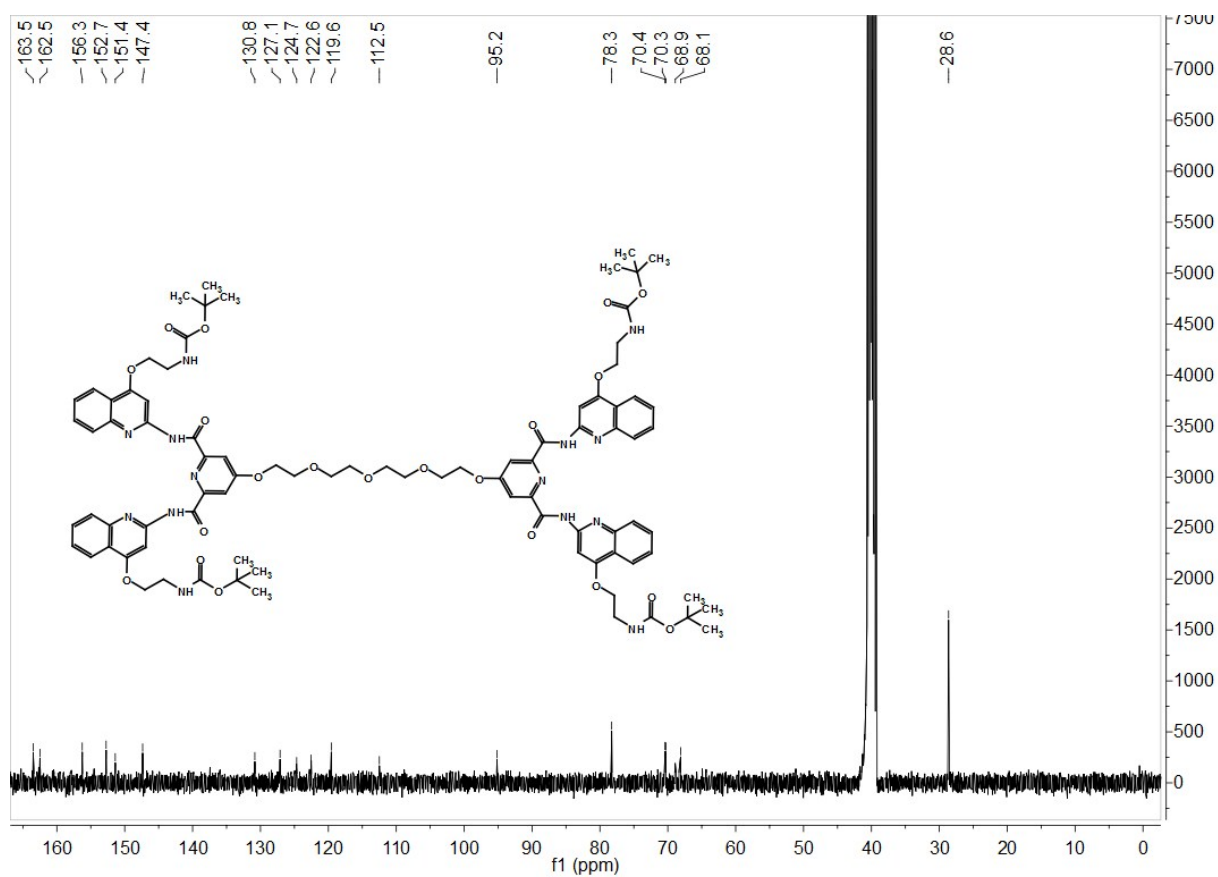

**Figure S11**  $^{13}\text{C}$  NMR (100 MHz) of compound **6c** in  $\text{DMSO}-d_6$ .

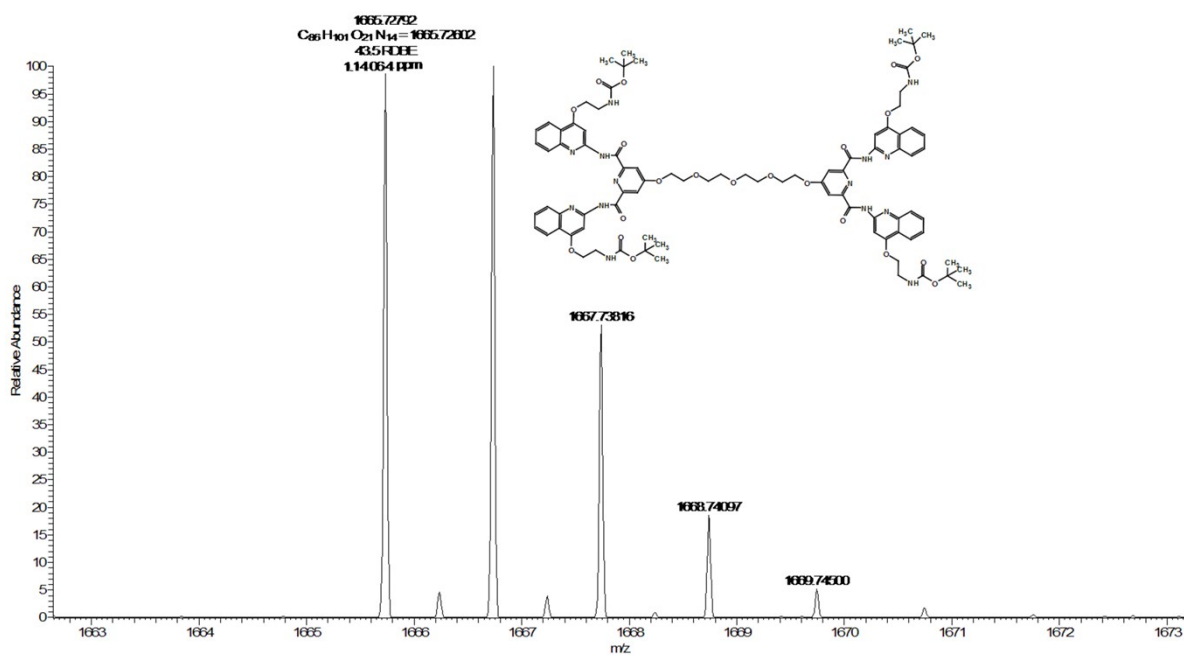

**Figure S12** HR-ESI-MS of compound **6c**.

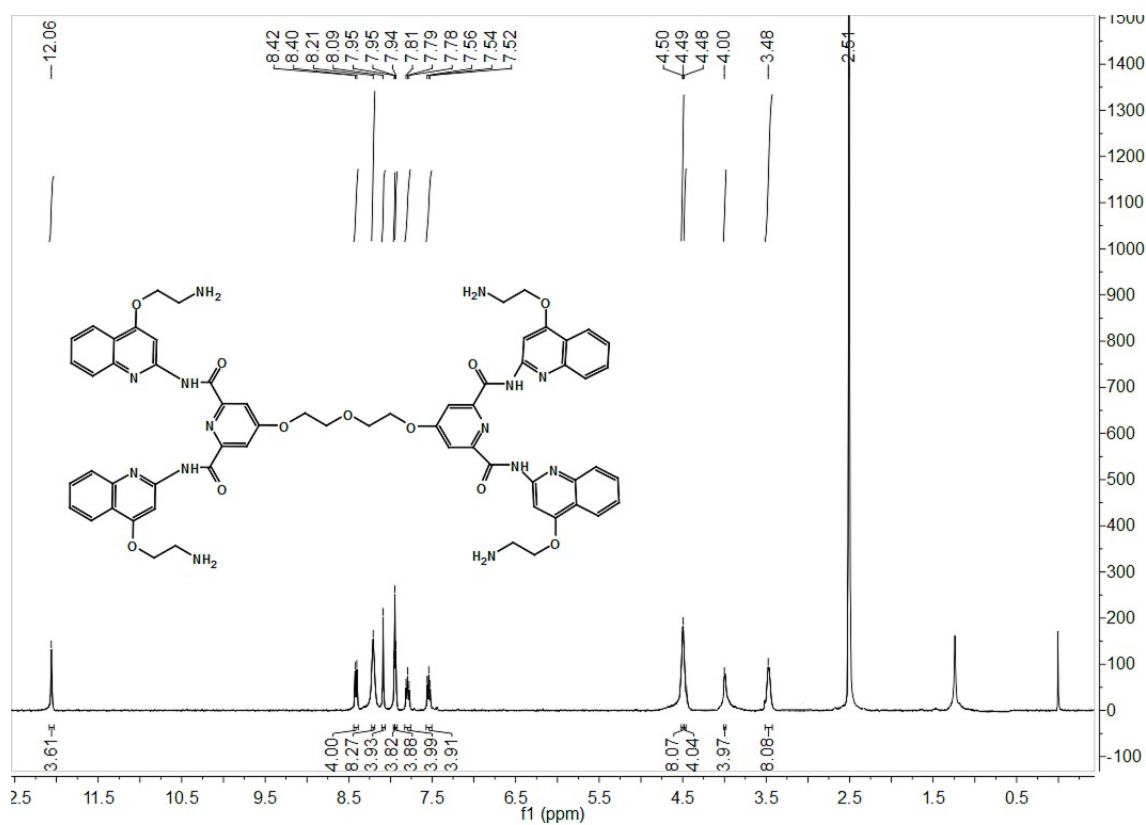

**Figure S13** <sup>1</sup>H NMR (400 MHz) of dimer **1a** in DMSO-*d*<sub>6</sub>.

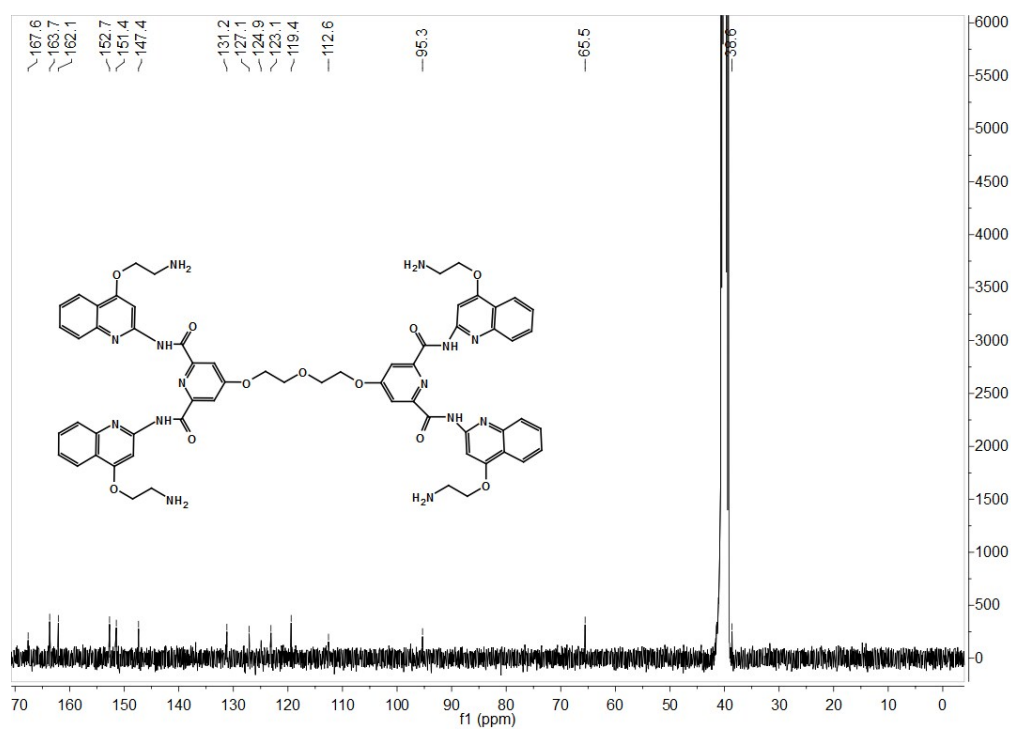

**Figure S14** <sup>13</sup>C NMR (100 MHz) of dimer **1a** in DMSO-*d*<sub>6</sub>.

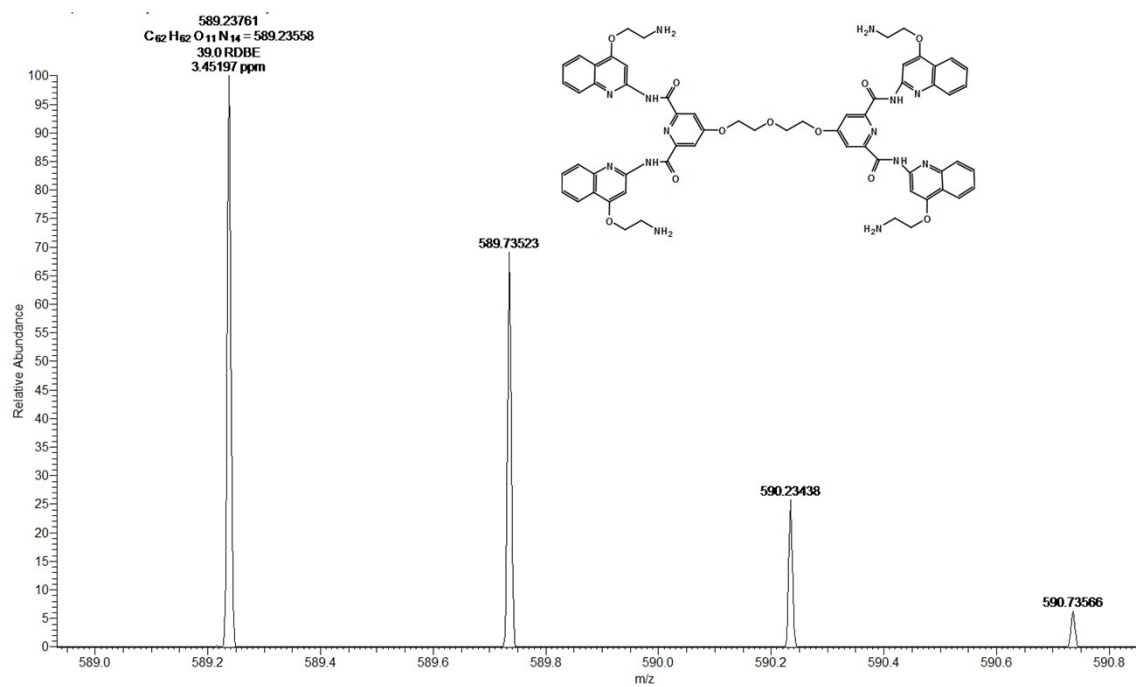

**Figure S15** HR-ESI-MS of dimer **1a**.

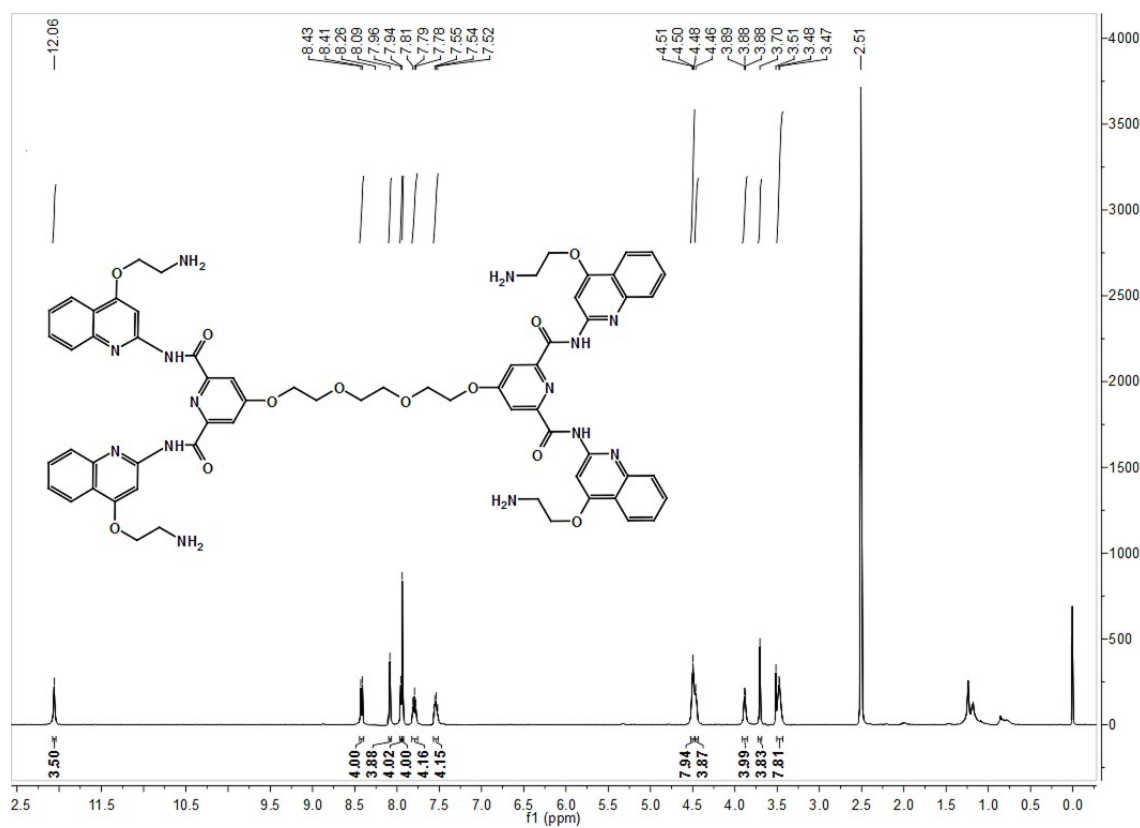

**Figure S16**  $^1H$  NMR (400 MHz) of dimer **1b** in  $DMSO-d_6$ .

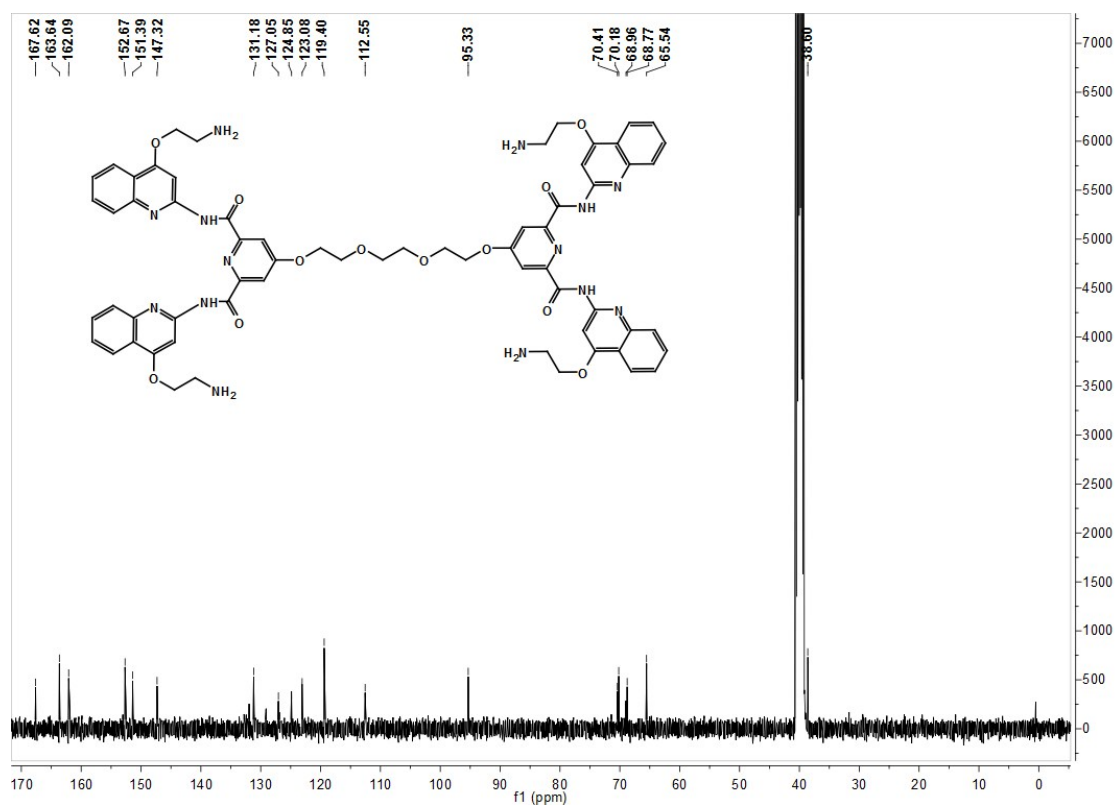

**Figure S17**  $^{13}\text{C}$  NMR (100 MHz) of dimer **1b** in  $\text{DMSO}-d_6$ .

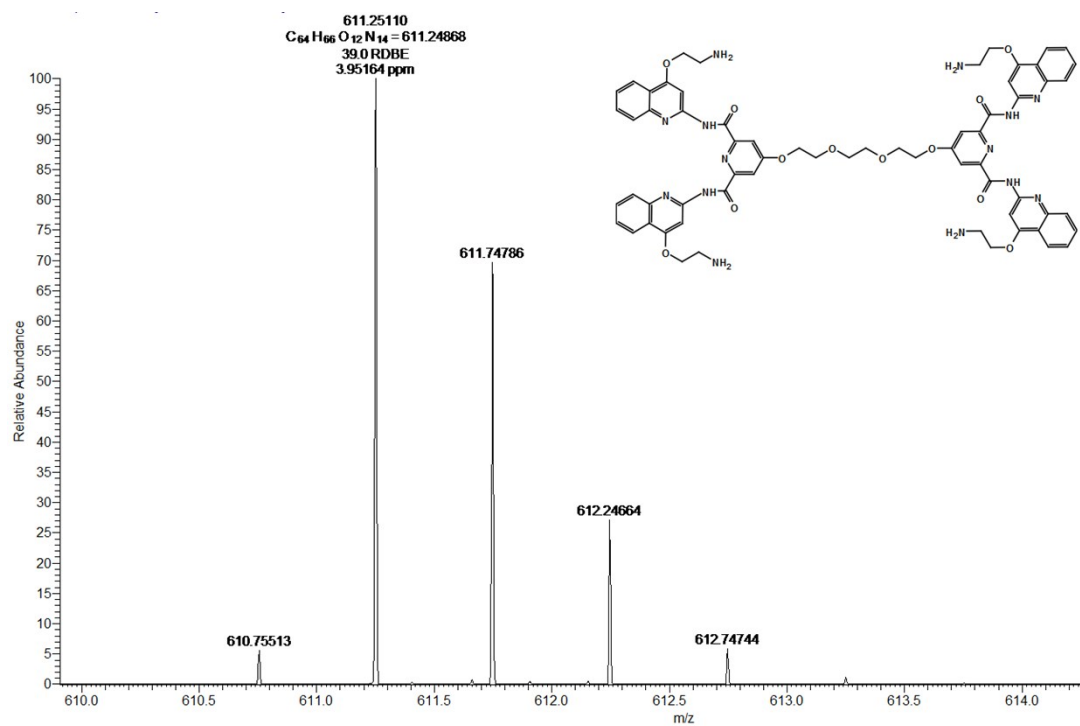

**Figure S18** HR-ESI-MS of dimer **1b**.

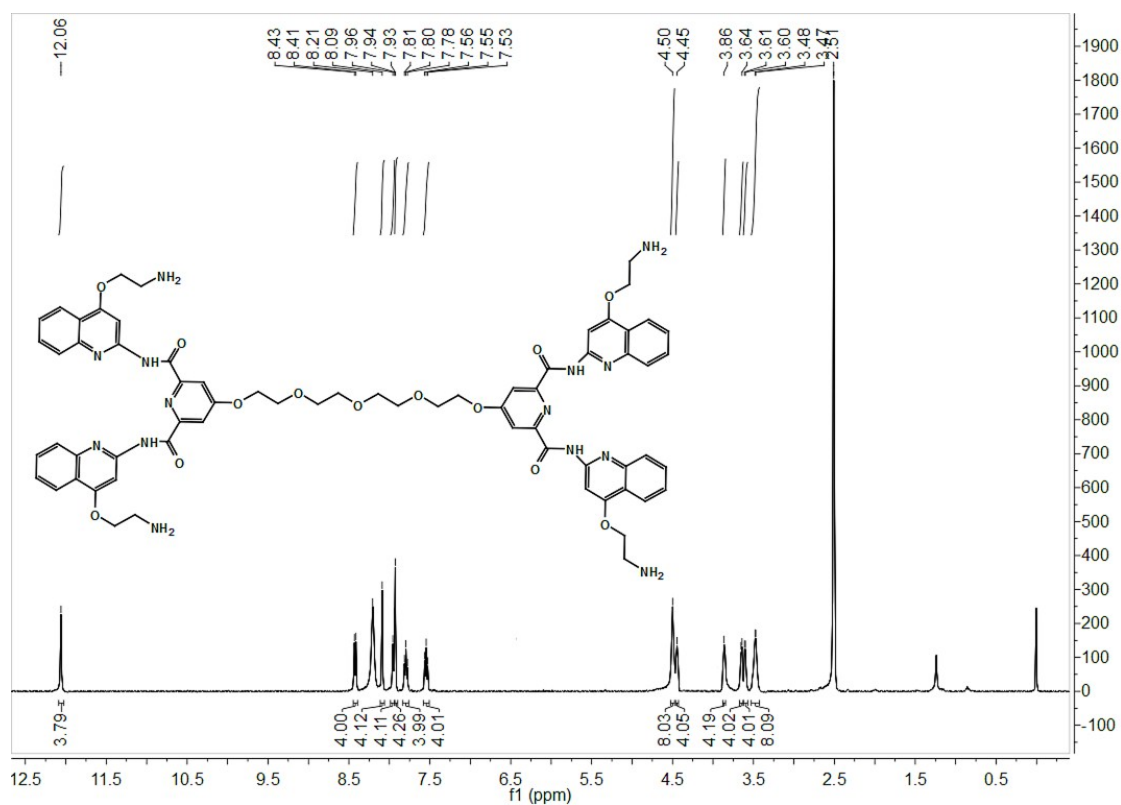

**Figure S19**  $^1\text{H}$  NMR (400 MHz) of dimer **1c** in  $\text{DMSO}-d_6$ .

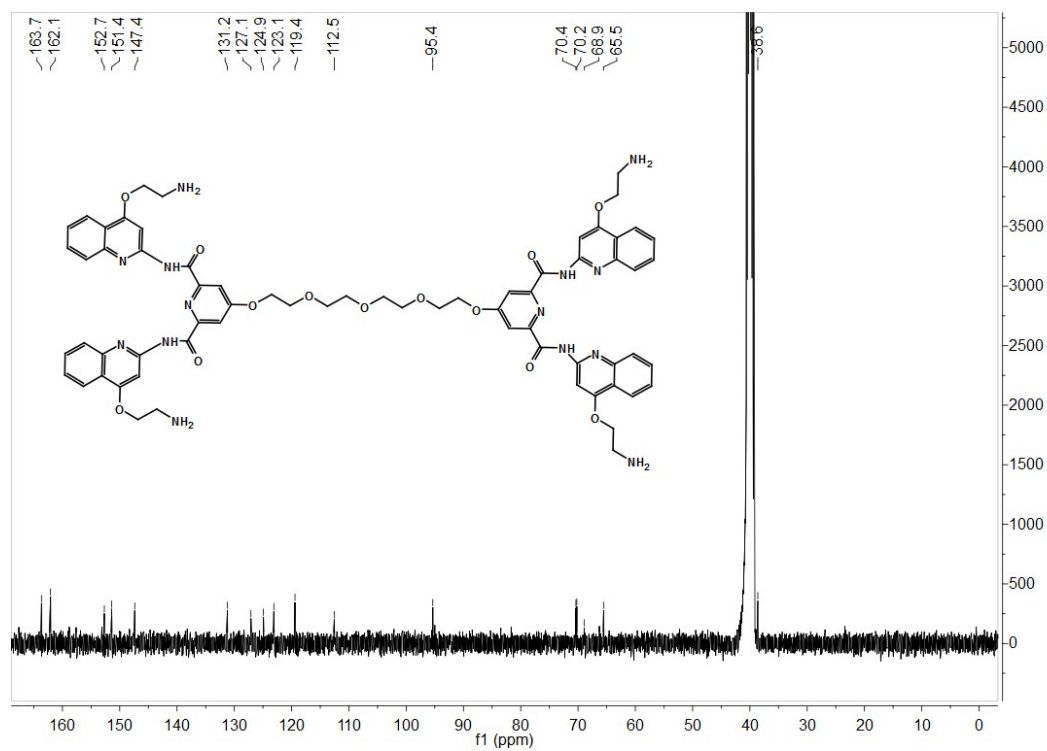

**Figure S20**  $^{13}\text{C}$  NMR (100 MHz) of dimer **1c** in  $\text{DMSO}-d_6$ .

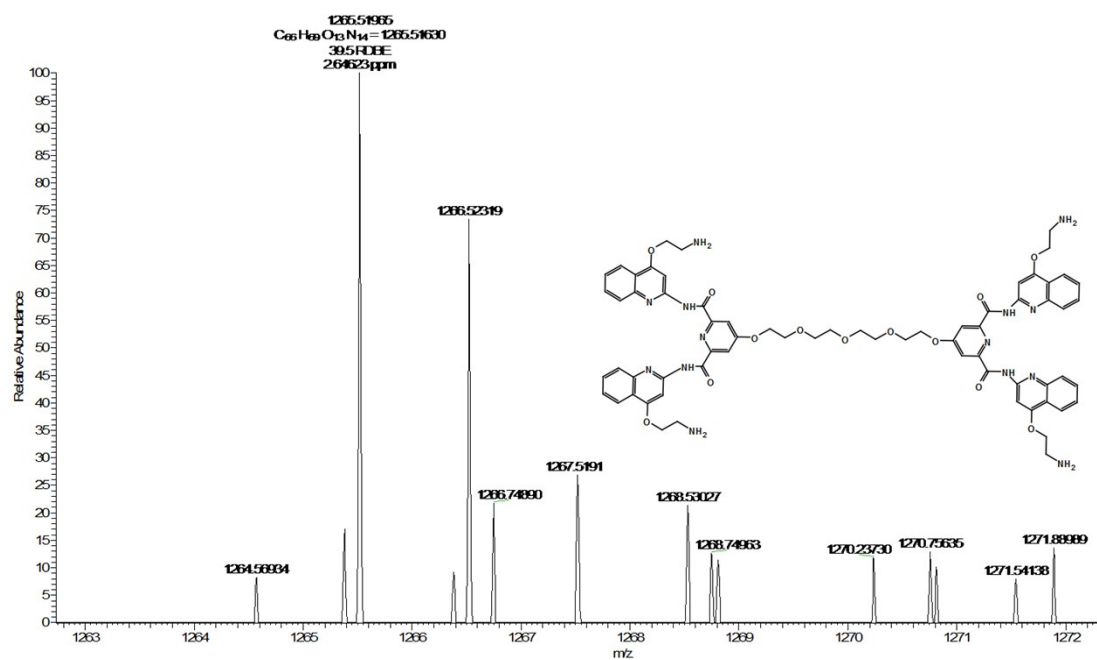

Figure S21 HR-ESI-MS of dimer **1c**.

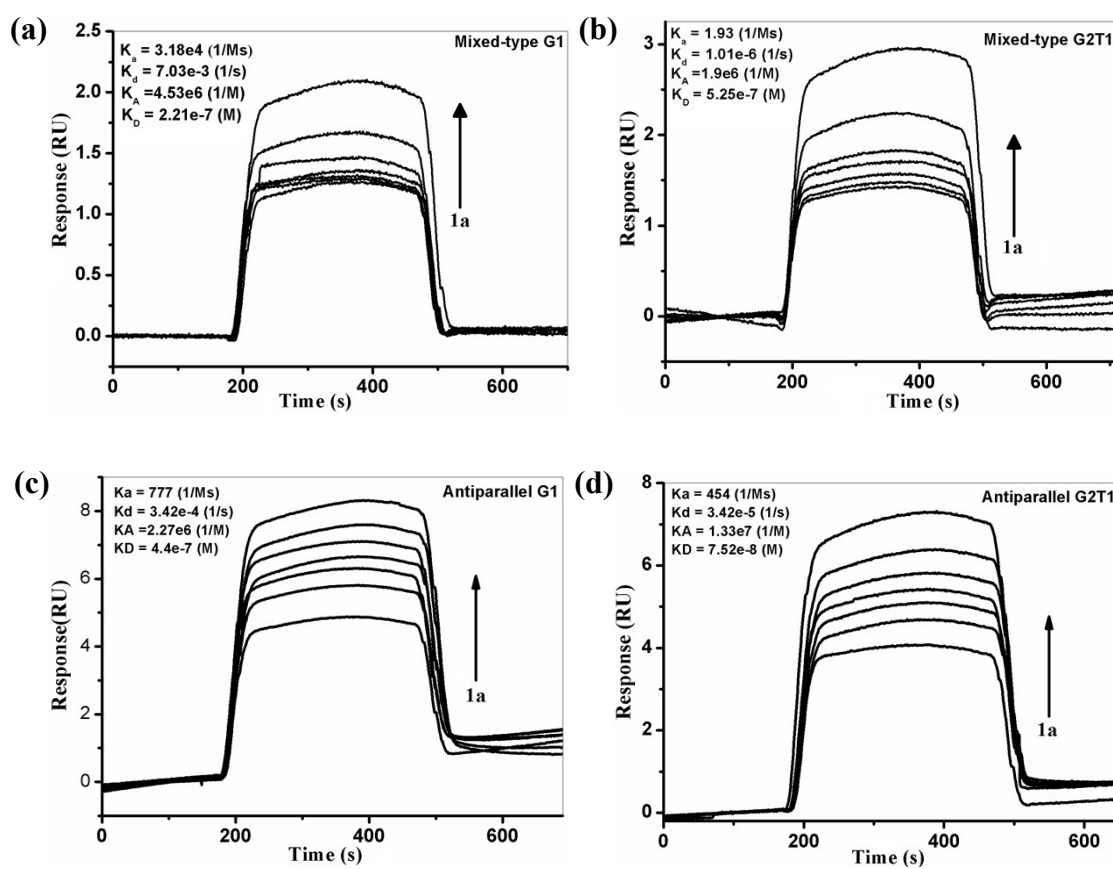

Figure S22 SPR of dimer **1a** towards mixed-type G1 (a), mixed-type G2T1 (b), antiparallel

G1 (c) and antiparallel G2T1 (d).

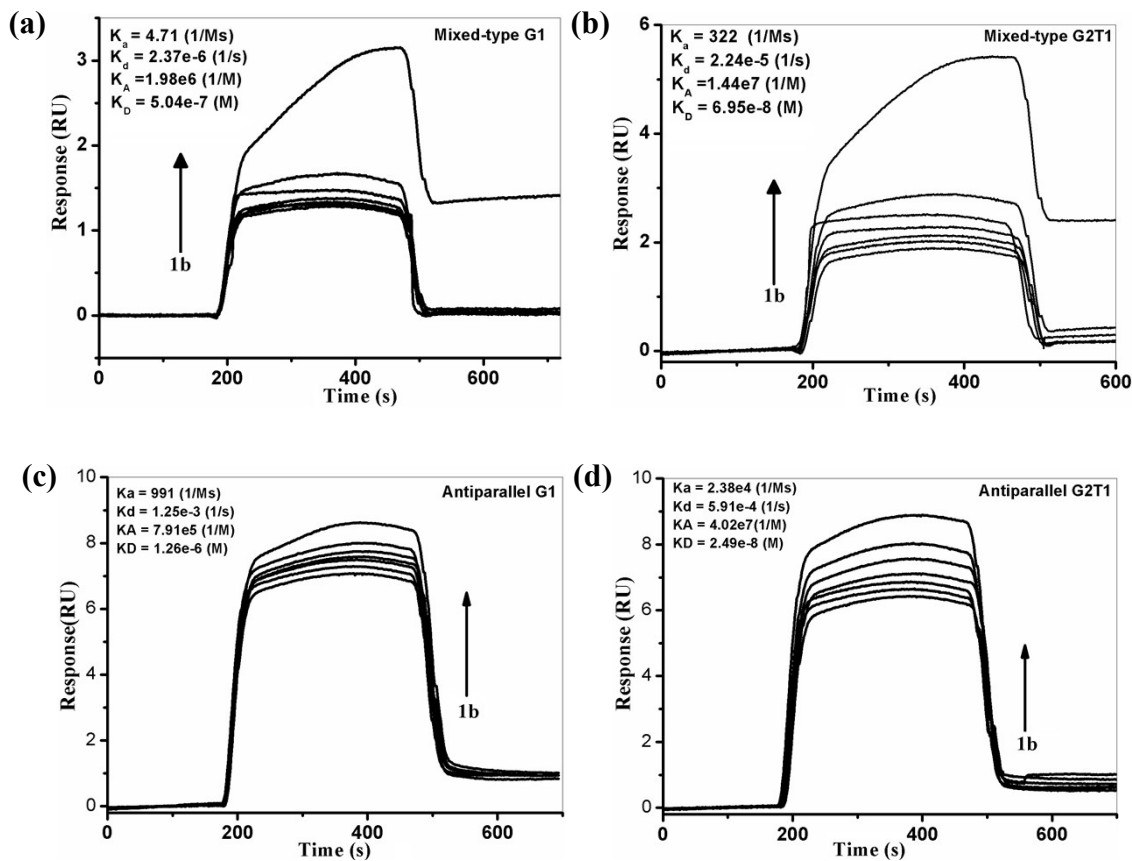

**Figure S23** SPR of dimer **1b** towards mixed-type G1 (a), mixed-type G2T1 (b), antiparallel G1 (c) and antiparallel G2T1 (d).

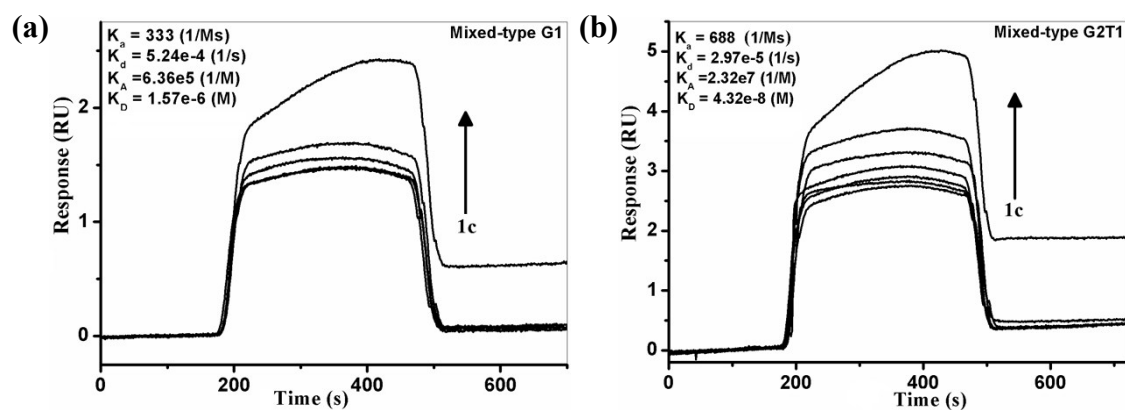

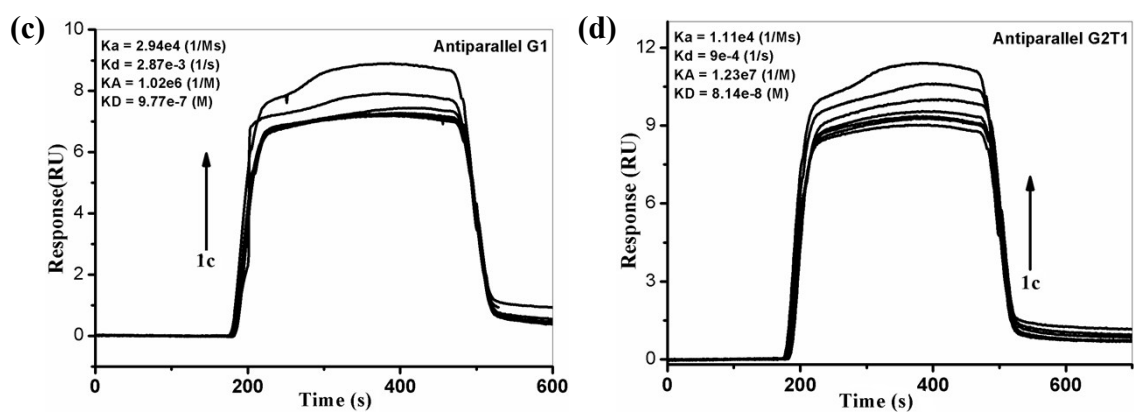

**Figure S24** SPR of dimer **1c** towards mixed-type G1 (a), mixed-type G2T1 (b), antiparallel G1 (c) and antiparallel G2T1 (d).

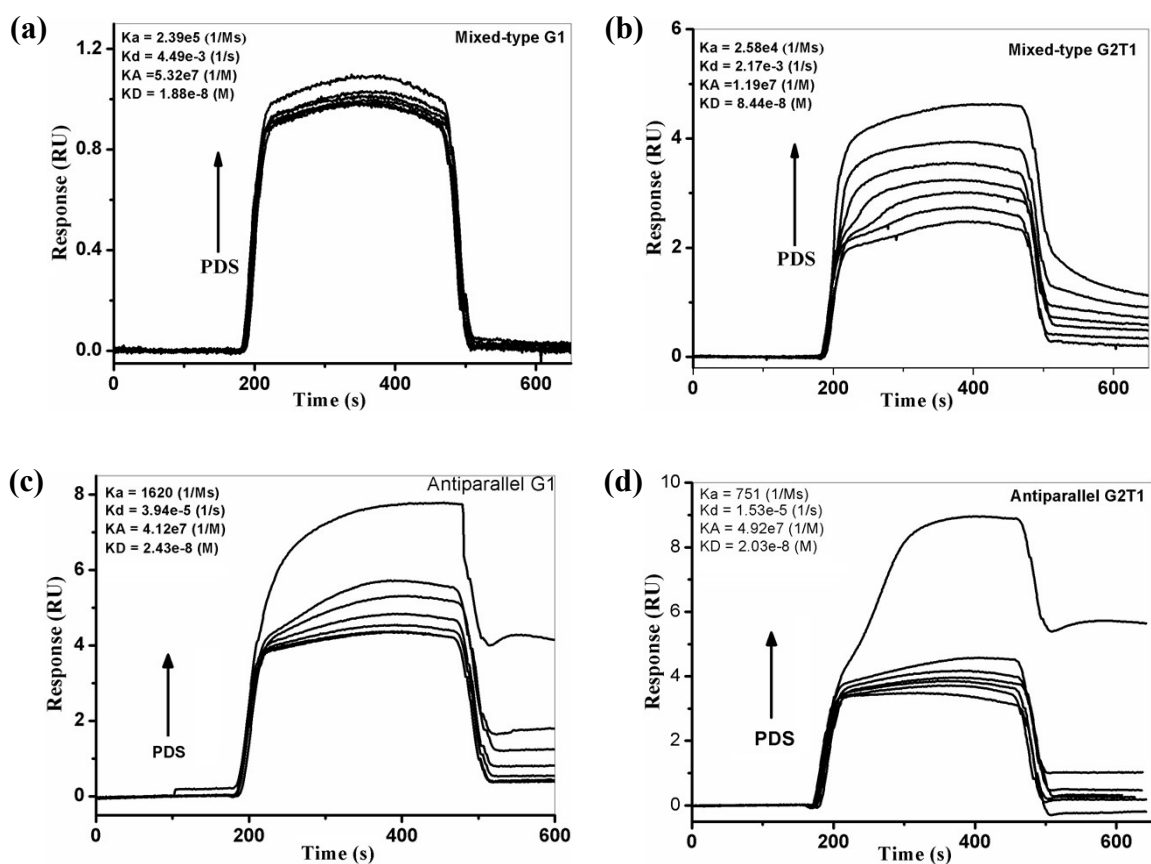

**Figure S25** SPR of monomer **PDS** towards mixed-type G1 (a), mixed-type G2T1 (b), antiparallel G1 (c) and antiparallel G2T1 (d).

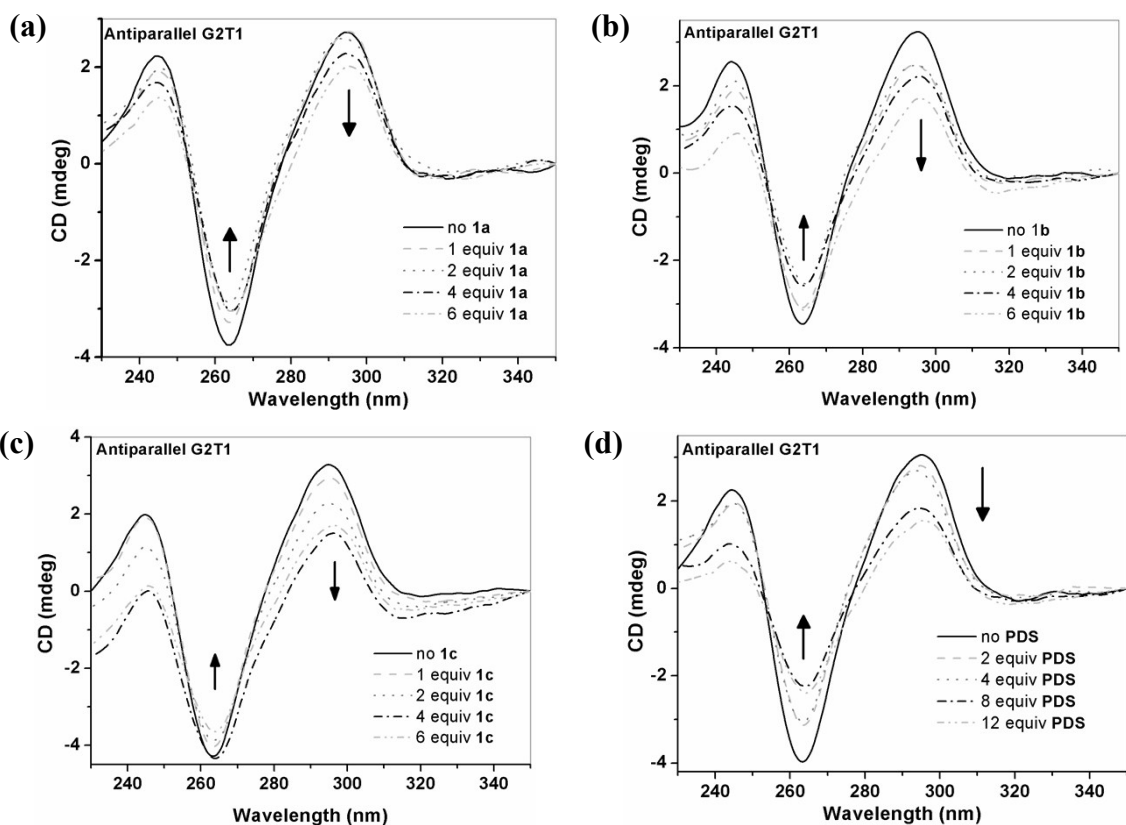

**Figure S26** CD spectra of antiparallel G2T1 (5  $\mu$ M) in 10 mM Tris-HCl and 100 mM NaCl with varying equivalents of dimers **1a** (a), **1b** (b), **1c** (c) and monomer **PDS** (d), respectively.

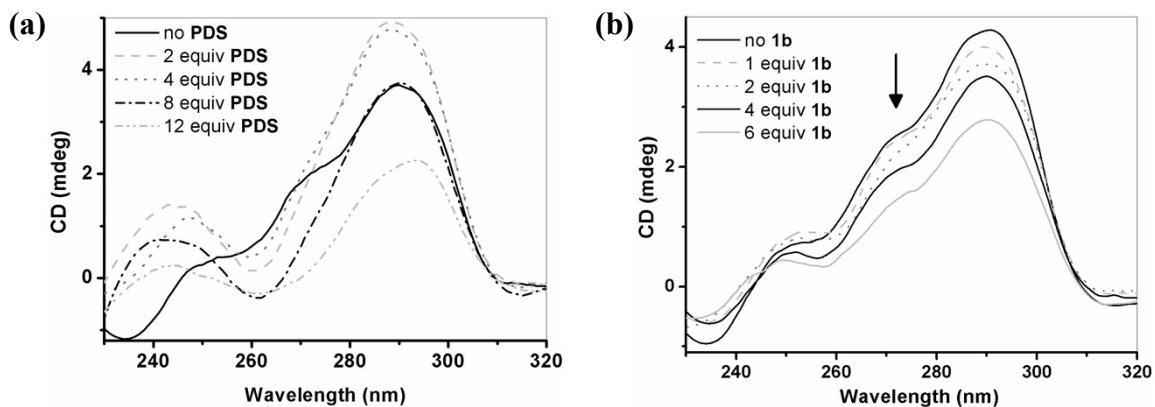

**Figure S27** CD spectra of mixed-type G2T1 (5  $\mu$ M) in 10 mM Tris-HCl and 60 mM KCl (pH 7.0) with varying equivalents of monomer **PDS** (a) and dimer **1b** (b), respectively.

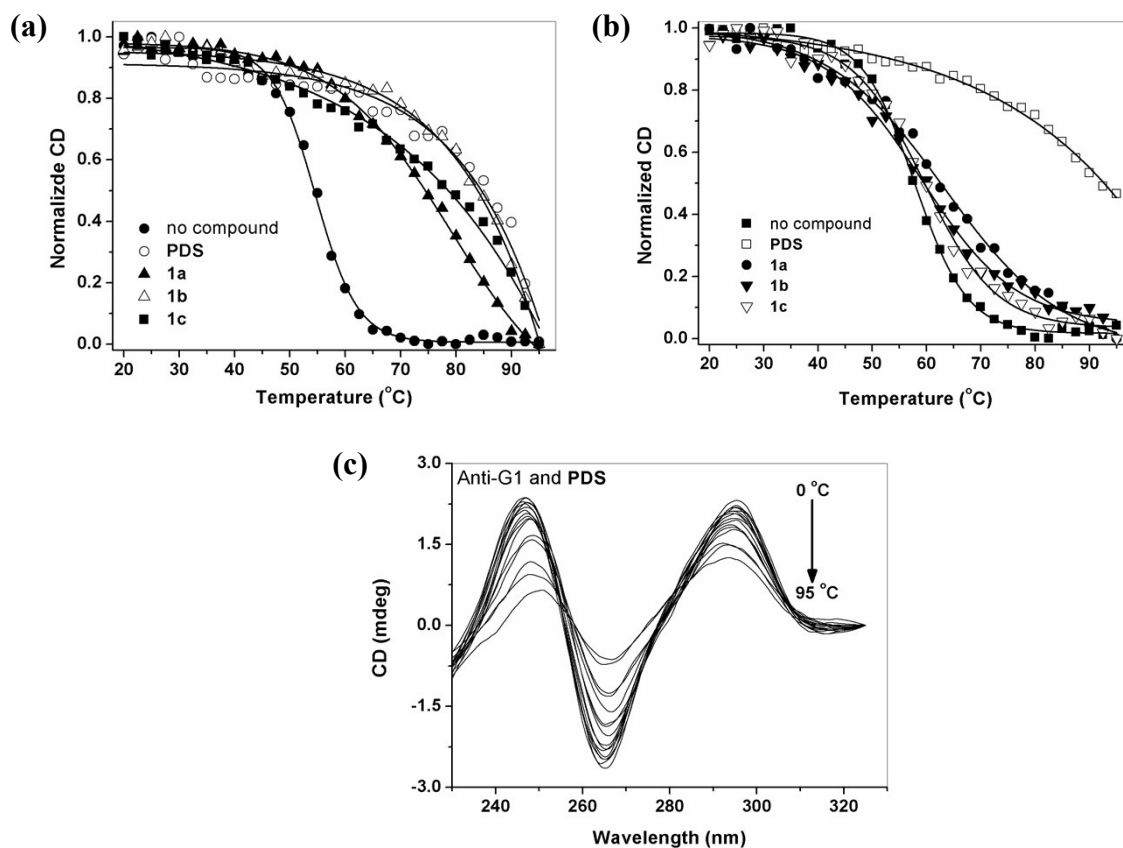

**Figure S28** (a) and (b) CD melting profiles at 295 nm for antiparallel G2T1 (10 μM, a) and antiparallel G1 (20 μM, b) in the presence of compounds **PDS** and **1a~c**. (c) CD spectra of antiparallel G1 (20 μM) from 20 °C to 95 °C with monomer **PDS** (120 μM). Buffer: 10 mM Tris-HCl and 100 mM NaCl (pH 7.0).

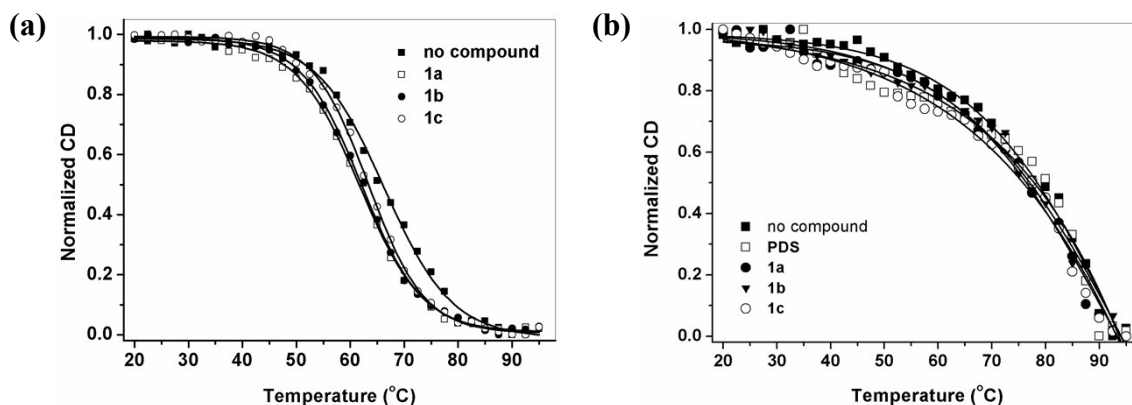

**Figure S29** CD melting profiles at 295 nm for mixed-type G1 (20 μM, a) and at 275 nm for ds DNA (20 μM, b) in the presence of monomer **PDS** and dimers **1a~c**. [dimer]:[G1] = 3:1,

$[\text{PDS}]:[\text{G1}] = 6:1$ ,  $[\text{dimer}]:[\text{ds DNA}] = 3:1$ ,  $[\text{PDS}]:[\text{ds DNA}] = 6:1$ .

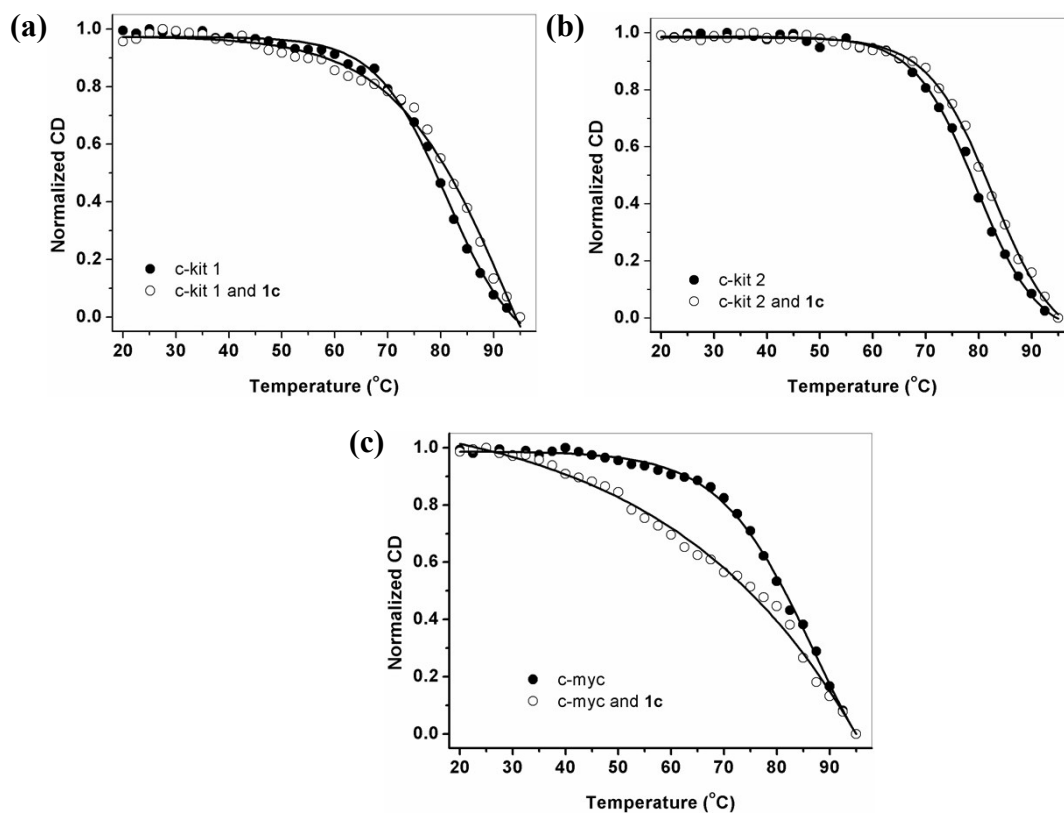

**Figure S30** CD melting profiles at 262 nm for c-kit 1 (20  $\mu\text{M}$ , a), c-kit 2 (20  $\mu\text{M}$ , b) and c-myc (20  $\mu\text{M}$ , c) in the presence of dimer 1c (60  $\mu\text{M}$ ).

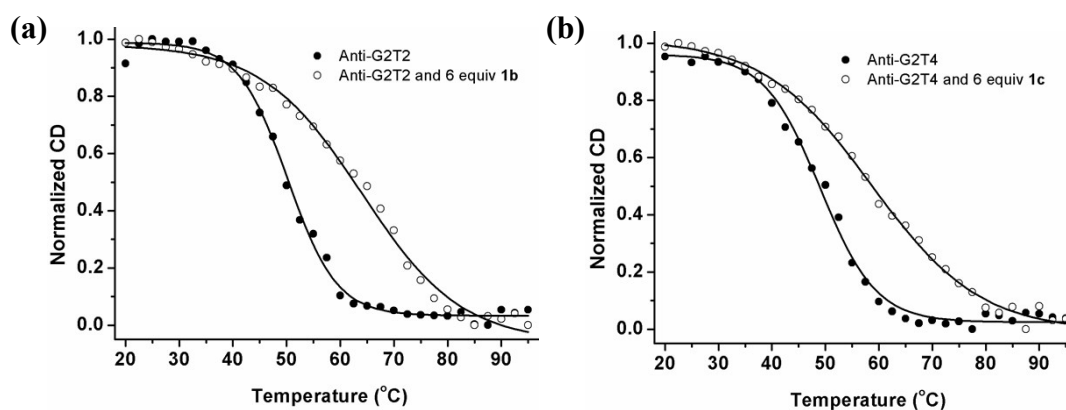

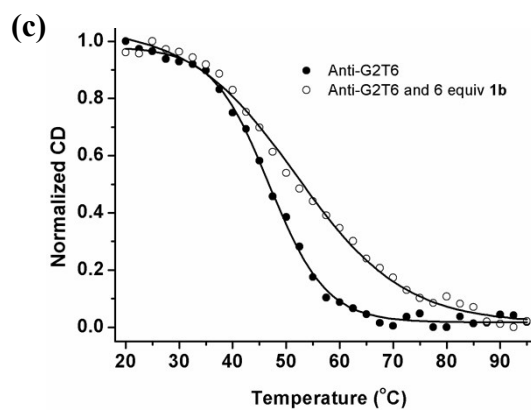

**Figure S31** CD melting profiles at 295 nm for antiparallel G2T2 (a), G2T4 (b) and G2T6 (c) in the presence of dimer **1b** in 10 mM Tris-HCl and 100 mM NaCl (pH 7.0).

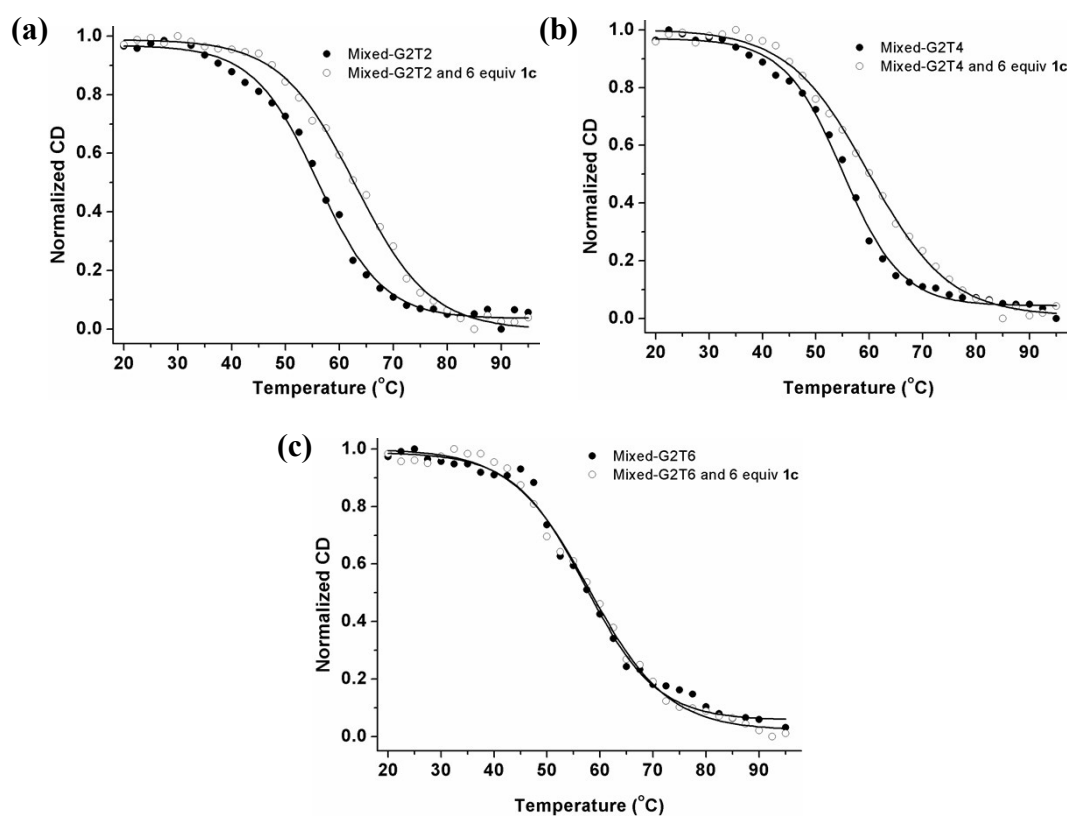

**Figure S32** CD melting profiles at 295 nm for mixed-type G2T2 (a), G2T4 (b) and G2T6 (c) in the presence of dimer **1c** in 10 mM Tris-HCl and 60 mM KCl (pH 7.0).

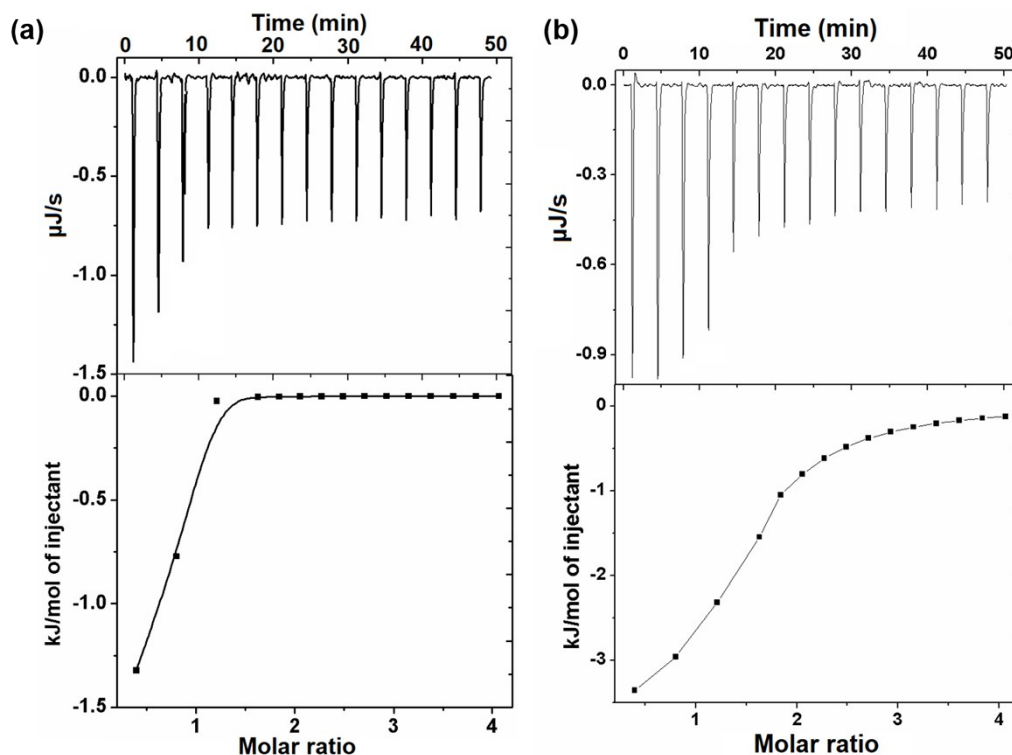

**Figure S33** Upper panel shows the isothermal titration plot of dimer **1b** (in cell) with antiparallel G2T1 (a) or G1 (b) (in syringe), whereas the lower panel shows the integrated heat profile of the calorimetric titration plot shown in upper panel. Buffer: 10 mM Tris-HCl, 100 mM NaCl and pH 7.0.

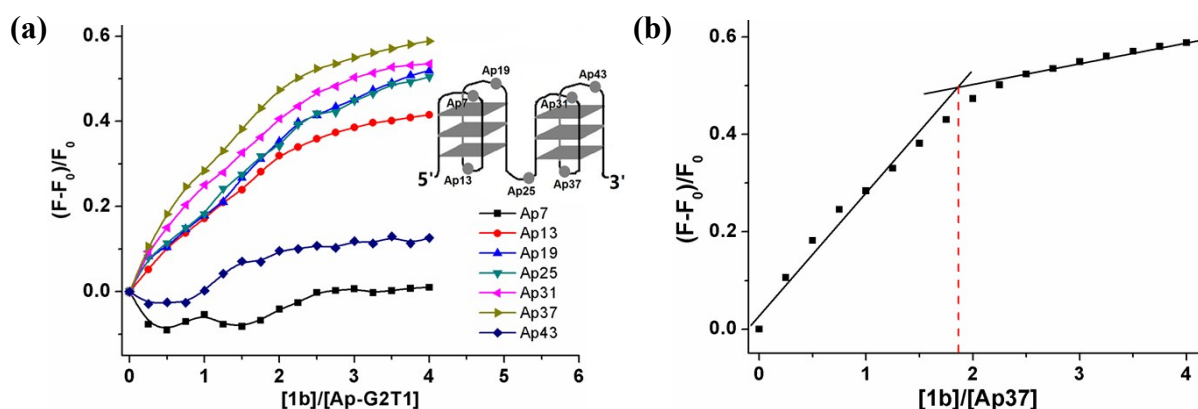

**Figure S34** (a) Plot of normalized fluorescence intensity at 370 nm of 2-Ap individually labelled antiparallel G2T1 (Ap7, Ap13, Ap19, Ap25, Ap31, Ap37 and Ap43, respectively) *versus* binding ratio of  $[\mathbf{1b}]/[\text{Ap-G2T1}]$ . (b) Plot of normalized fluorescence intensity at 370 nm of Ap37 *versus* binding ratio of  $[\mathbf{1b}]/[\text{Ap37}]$ . Buffer: 10 mM Tris-HCl, 100 mM NaCl

and pH 7.0.

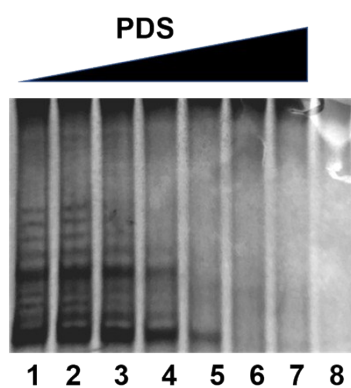

**Figure S35** Telomerase inhibition in the presence of monomer **PDS** by TRAP-LIG assay. Lane 1: (+) ve control (no dimer); lanes 2-7: 0.063, 0.125, 0.25, 0.5, 1.0 and 2.0  $\mu\text{M}$ , respectively; lane 8: (-) ve control (no enzyme and dimer).
